# Supplementary material
Source: MDPI journal article supplement (https://www.mdpi.com/2673-4591/37/1/108)
Supplement: s1 [file s1]

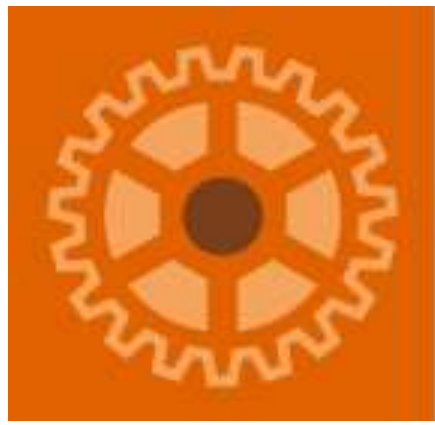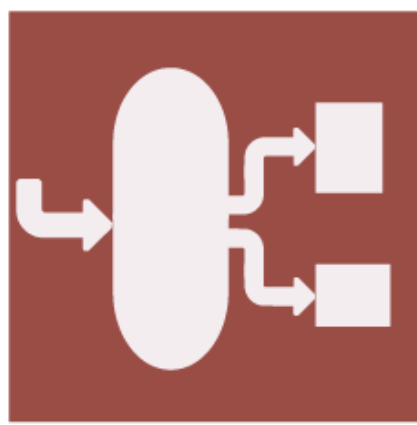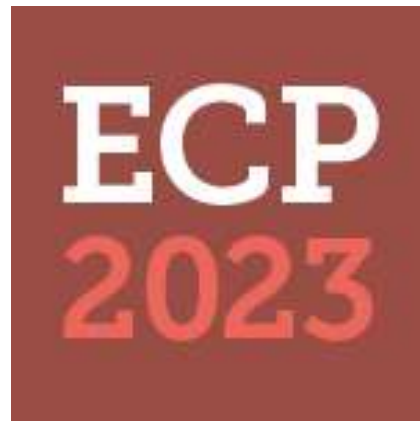

# Optimizing the thermal processing of honey by studying the physicochemical properties and its hydroxymethylfurfural content

S. Seyyedi-Mansour <sup>1</sup>, P. Donn<sup>1</sup>, P. Garcia-Oliveira<sup>1,2</sup>, J. Echave <sup>1</sup>, F. Chamorro <sup>1</sup>, A.G. Pereira <sup>1,2</sup>, A. Silva <sup>3,1</sup>,  
A. Perez-Vazquez<sup>1</sup>, J. Simal-Gandara <sup>1</sup>, M.A. Prieto <sup>1,2,\*</sup> and L. Roufegari-nejad<sup>4,\*</sup>

<sup>1</sup> Nutrition and Bromatology Group, Department of Analytical and Food Chemistry, Faculty of Food Science and Technology, University of Vigo, Ourense Campus, E32004 Ourense, Spain.

<sup>2</sup> Centro de Investigação de Montanha (CIMO), Instituto Politécnico de Bragança, Campus de Santa Apolonia, 5300-253 Bragança, Portugal.

<sup>3</sup> LAQV-REQUIMTE Department of Chemistry and Biochemistry. Faculty of Sciences. University of Porto. Rua do Campo Alegre s/n 4169-007 Porto, Portugal.

<sup>4</sup> Department of Food Science and Technology, Azad University, Tabriz branch, Iran Basmenj road, 5157944533, Tabriz, Iran.

\* **Correspondence:** mprieto@uvigo.es, L.roufegari@iaut.ac.ir.

## INTRODUCTION

Honey, due to its valuable nutritious components and antimicrobial and antioxidative effects, has a nutritional importance [1]. Honey producers heat honey in order to prevent post-bottling crystallization and delay microbial spoilage. In spite of its desirable effects, heating causes some deterioration in honey’s physicochemical properties and leads to the formation of unhealthy components such as hydroxyl methyl furfural (HMF) [2]. The formation of this compound during heat treatment is one of the major challenges of consumer safety, and because of its carcinogenic and mutagenic effects, there is strong research potential to achieve the legal levels of food safety. The maximum level of HMF in honey is set at 40 ppm under the codex standards [3]. Thus, the modeling and identification of a relationship between different heat treatment and storage parameters could be a reasonable approach to optimize the process and increase the quality and safety of the end product.

## METHODS

This research applied Response Surface Methodology (RSM) and Central Composite Design (CCD) to 1) survey independent variable effects such as heating pasteurization temperature (55, 65 and 75(°C), time of heating (10, 20 and 30 min) and storage temperature (25 and 40(°C) on physicochemical properties (moisture content, pH, color parameters) and HMF formation at the two different storage time (45 and 90 days); 2) find the optimal conditions to minimize the HMF formation (Table 1).

**Table 1.** Central composite design (by Minitab 16 software)

| Run Order | Block | Heating pasteurization temperature (°C) | Time of heating (min) | Storage temperature (°C) |
|-----------|-------|-----------------------------------------|-----------------------|--------------------------|
| 1         | 1     | 65                                      | 20                    | 25                       |
| 2         | 1     | 55                                      | 30                    | 25                       |
| 3         | 1     | 55                                      | 10                    | 25                       |
| 4         | 1     | 75                                      | 10                    | 25                       |
| 5         | 1     | 65                                      | 20                    | 25                       |
| 6         | 1     | 65                                      | 20                    | 25                       |
| 7         | 1     | 75                                      | 30                    | 25                       |
| 8         | 2     | 65                                      | 20                    | 40                       |
| 9         | 2     | 65                                      | 30                    | 40                       |
| 10        | 2     | 65                                      | 20                    | 40                       |
| 11        | 2     | 65                                      | 10                    | 40                       |
| 12        | 2     | 55                                      | 20                    | 40                       |
| 13        | 2     | 75                                      | 20                    | 40                       |
| 14        | 2     | 65                                      | 20                    | 40                       |

## RESULTS

The results showed that the heating, processing time, and storage time had no effect on the pH, moisture, or color (data not shown), while the storage temperature had a significant effect on the L\* and a\* parameters. All the studied factors showed a significant effect on HMF formation ( $p < 0.05$ ), indicating that this content was significantly increased with the increasing heating time, temperature, and storage conditions (Figure 1, 2). From the optimization study, it can be concluded that the minimum content of HMF resulted from heating the honey at 55 C for 10 min and keeping it at 25 C for 45 days. These processing and storage conditions could help us to find the best operation conditions with which to preserve both the quality and safety of honey.

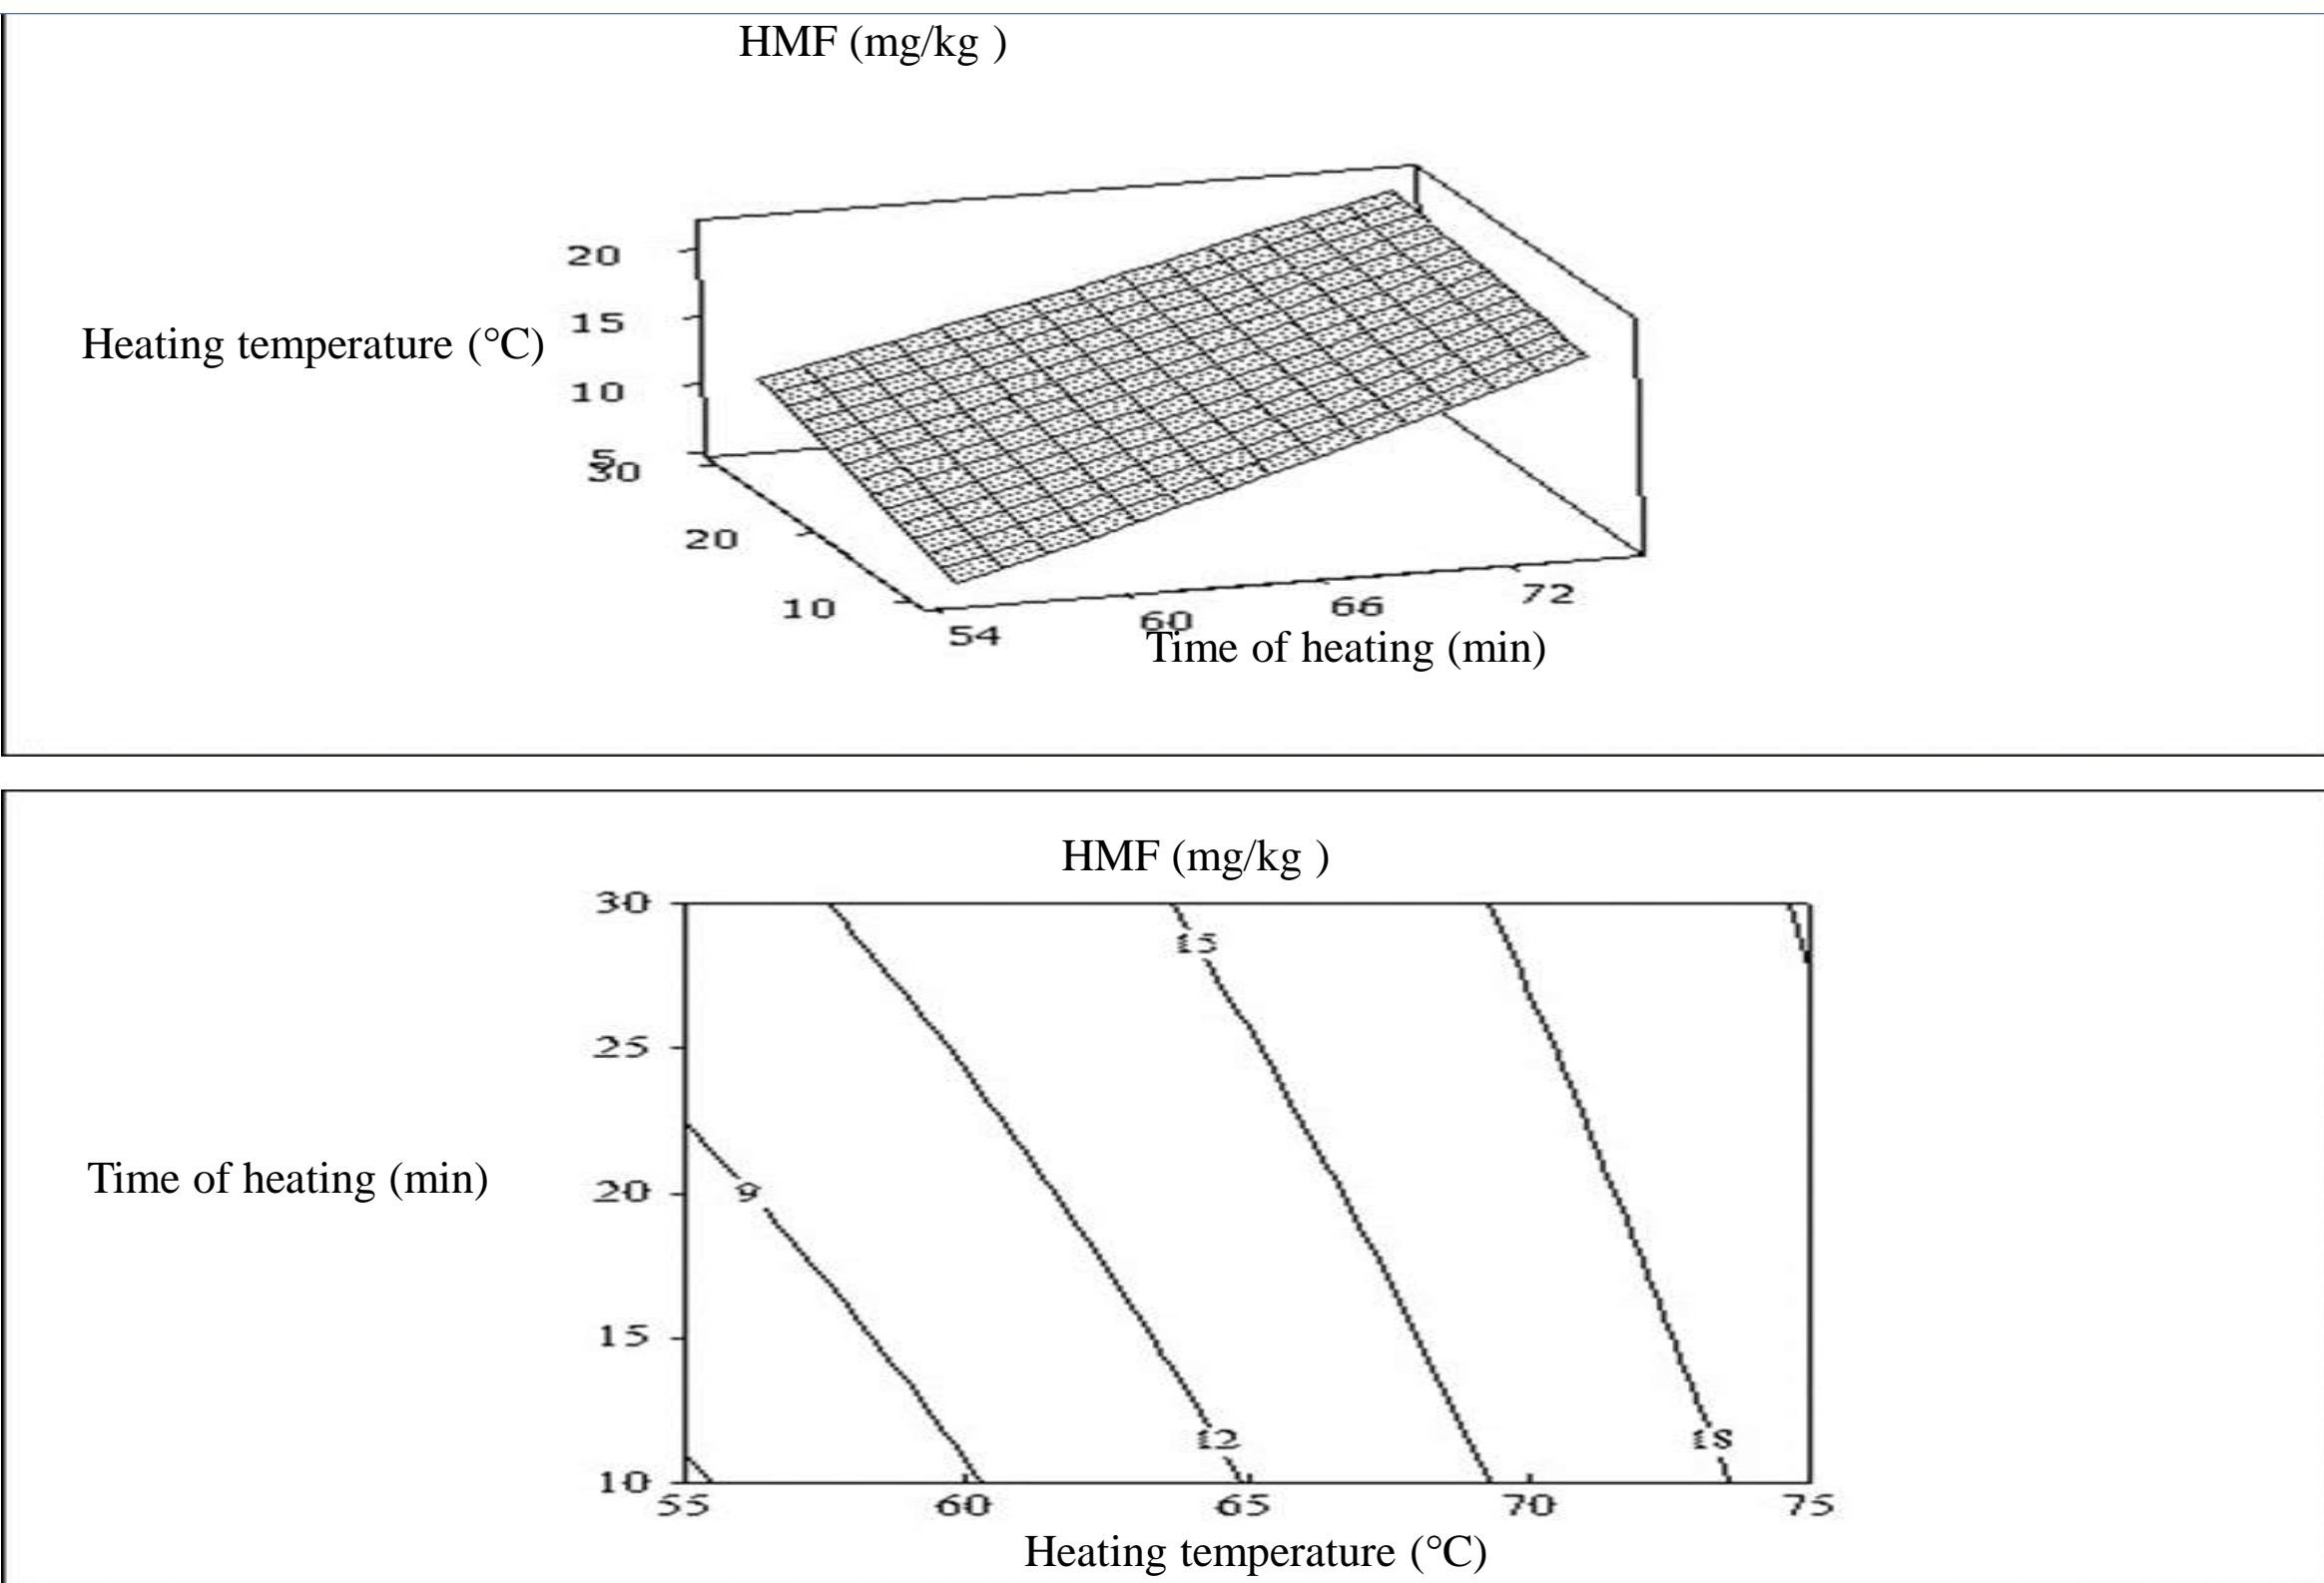

**Figure 1.** The effect of thermal process temperature on the amount of hydroxymethylfurfural during 45 days storage

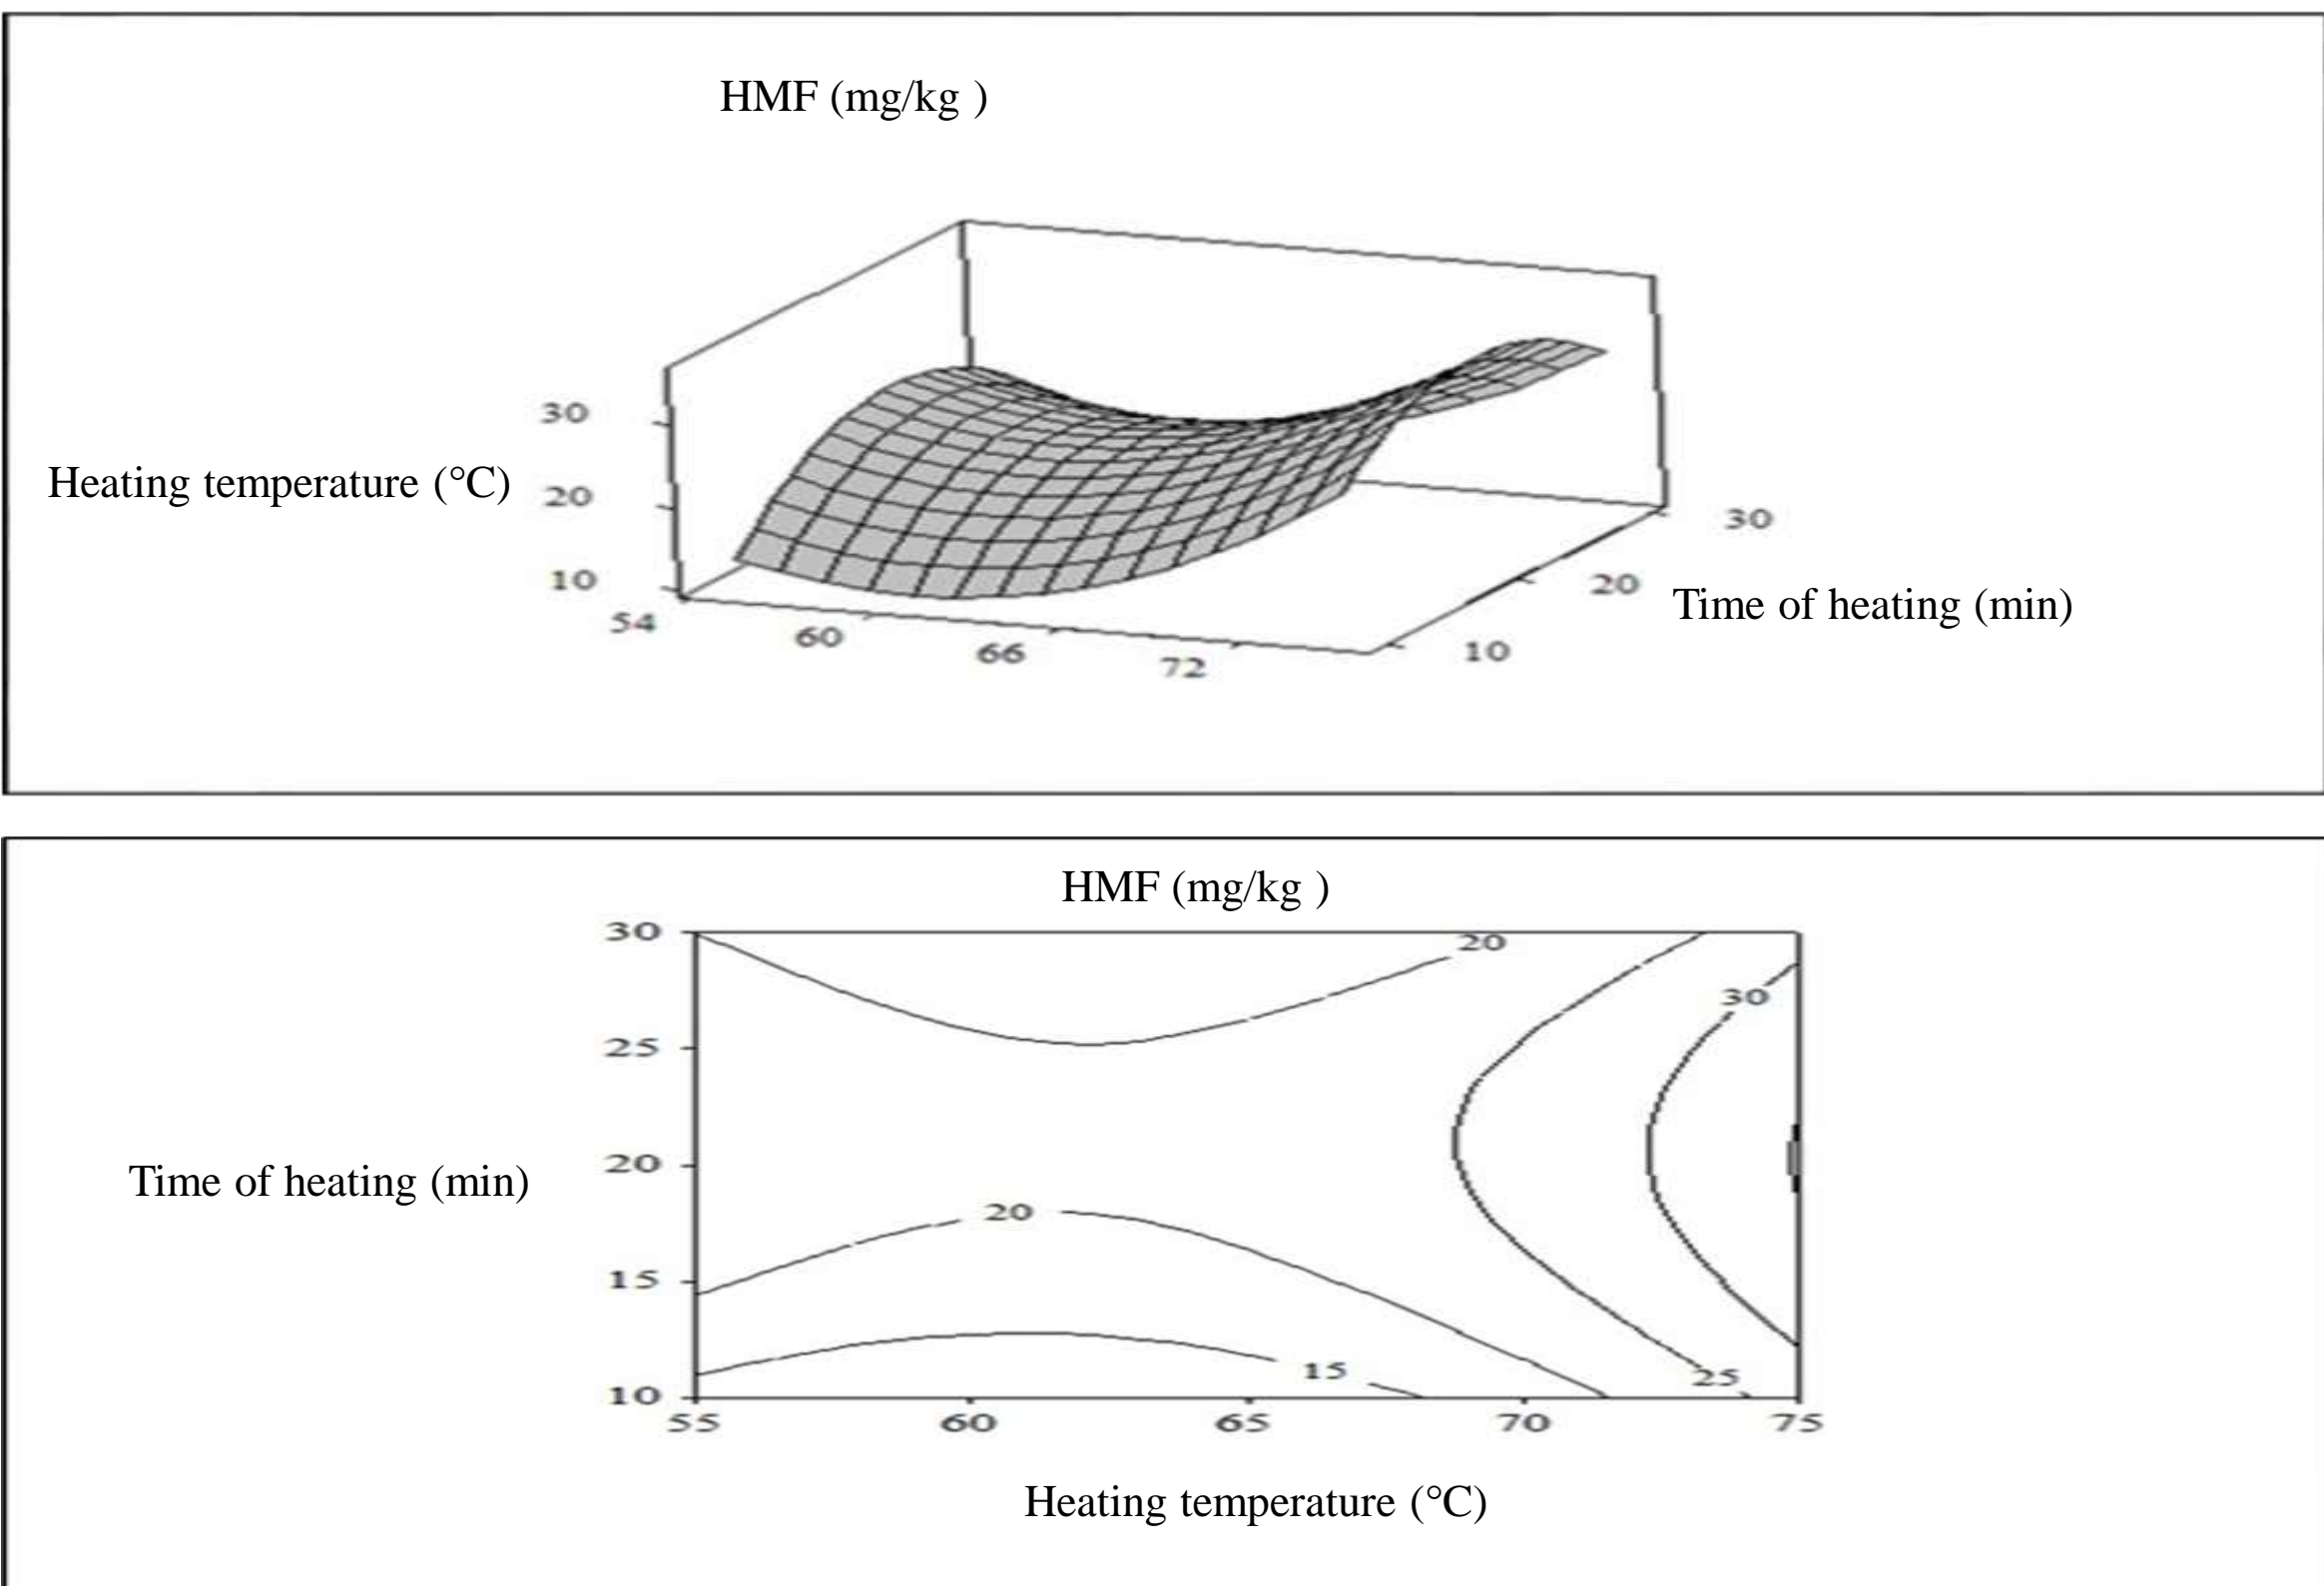

**Figure 2.** The effect of thermal process temperature on the amount of hydroxymethylfurfural during 90 days storage

### References

1. Codex alimentarius (2001). Standard for honey 12-1981. Adopted in 1981. Revised in 1987, 2001. Amended in 2019. [Online]. p. 1–8. Available: [https://www.fao.org/fao-who-codex-aliments/norms/sh-proxy/es/?lnk=1&url=https%253A%252Fw.orksp.ace.fao.org%252Fs.ites%252Fc.odex%252FS.tanda.rds%252FC.XS%2B12-1981%252FC.XS\\_012e.pdf](https://www.fao.org/fao-who-codex-aliments/norms/sh-proxy/es/?lnk=1&url=https%253A%252Fw.orksp.ace.fao.org%252Fs.ites%252Fc.odex%252FS.tanda.rds%252FC.XS%2B12-1981%252FC.XS_012e.pdf). Accessed 04 March 2022.
2. Ünübol Aypak S, İnci A, Bakırcı S, Dereli Fidan E, Soysal M. Comparison of antioxidant activity and hydroxymethylfurfural (HMF) levels in honey taken from hives and markets. GIDA / J FOOD. 2019;44:86–92.
3. Kamboj R, Sandhu RS, Kaler RSS, Bera MB, Nanda V. Optimization of process parameters on hydroxymethylfurfural content, diastase and invertase activity of coriander honey. J Food Sci Technol. Springer India; 2019;56:3205–14.

### Acknowledgments:

The research leading to these results was supported by MICINN, supporting the Ramón y Cajal grant for M.A.Prieto (RYC-2017-22891), and by Xunta de Galicia, supporting the program EXCELENCIA-ED431F 2020/12, as well as the pre-doctoral grants of P.Garcia-Oliveira (ED481A-2019/295) and A.G.Pereira (ED481A-2019/0228). The authors express their thanks for the program BENEFICIOS DO CONSUMO DAS ESPÉCIES TINTORERA-(CO-0019-2021), which supports the work of F.Chamorro.
